# Supplementary material for: Size distribution and source of black carbon aerosol inurban Beijing during winter haze episodes
Source: Copernicus journal article supplement (doi:10.5194/acp-2016-1096), 2016-12-06
Supplement: Supplementary file 1 [file acp-2016-1096-supplement.pdf]

## Supplemental file

### Size distribution and source of black carbon aerosol in urban Beijing during winter haze episodes

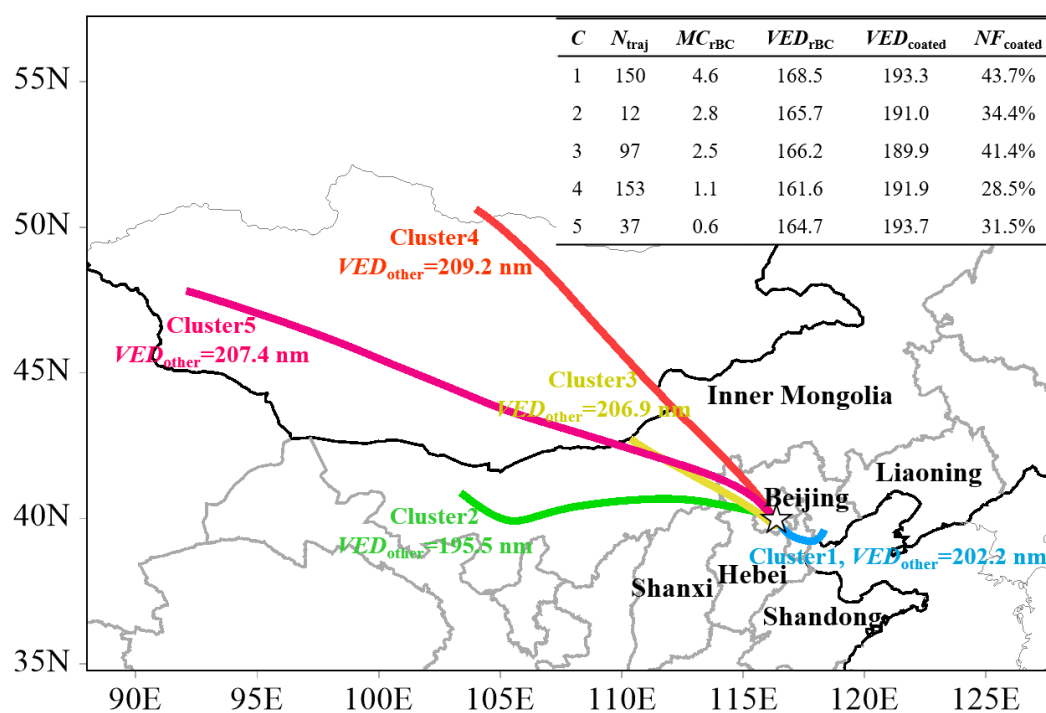

Fig. S1. Geographical location of the observation site (star) and clusters of 48-h backward trajectories that arrived at the observation site 100 m above ground level during a campaign conducted from 24 February to 15 March 2014. Mean values of the mass concentration and volume-equivalent diameter (*VED*) of rBC (i.e., *MC*<sub>rBC</sub> and *VED*<sub>rBC</sub>), as well as the *VED* and number fraction of thickly coated rBC (i.e., *VED*<sub>coated</sub> and *NF*<sub>coated</sub>) for each cluster are presented.
